# Supplementary material for: Communication strategies to address geo-hydrological risks: the POLARIS web initiative in Italy
Source: Copernicus journal article supplement (doi:10.5194/nhess-2015-354), 2016-01-19
Supplement: Supplementary file [file nhess-2015-354-AC3-supplement.pdf]

1

2 **Communication strategies to address geo-hydrological risks:**  
3 **the POLARIS web initiative in Italy**

4

5 P. Salvati<sup>1</sup>, U. Pernice<sup>2</sup>, C. Bianchi<sup>1</sup>, I. Marchesini<sup>1</sup>, F. Fiorucci<sup>1</sup>, F. Guzzetti<sup>1</sup>

6 (1) Consiglio Nazionale delle Ricerche, Istituto di Ricerca per la Protezione Idrogeologica, via Madonna Alta 126, I-06128  
7 Perugia, Italy

8 (2) Innovation Consultant, Viale Michelangelo 2315, I-90135 Palermo, Italy

9 (\*) *Corresponding author*, Paola.Salvati@irpi.cnr.it, Tel. +39 075 50144427, Fax +39 075 5104420

10

11

12 **Abstract.** Floods and landslides are common phenomena that cause serious damage and pose a severe threat to  
13 the population of Italy. The societal and economic impact of floods and landslides in Italy is severe, and  
14 strategies to target the mitigation of the effects of these phenomena are needed. In the last few years, the  
15 scientific community has started to use web technology to communicate information on geo-hydrological  
16 hazards and the associated risks. However, the communication is often targeted to technical experts. In the  
17 attempt to communicate to a broader audience relevant information on geo-hydrological hazards with potential  
18 human consequences to the population, we designed the POLARIS website. POLARIS publishes accurate  
19 information on geo-hydrological risk to the population of Italy, including periodic reports on landslide and flood  
20 risk to the population, analyses of specific damaging events, and blog posts on landslide and flood events. By  
21 monitoring the access to POLARIS in the 21-month period between January 2014 and October 2015, we found  
22 that access increased during particularly damaging geo-hydrological events and immediately after the web site  
23 was advertised by press releases. POLARIS demonstrates that the scientific community can implement suitable  
24 communication strategies that address different societal audiences, exploiting the role of mass media and social  
25 media. The strategies can help multiple audiences understand how risks can be reduced through appropriate  
26 measures and behaviors, contributing to increasing the resilience of the population to geo-hydrological risk.

27

28

## 29 1 Introduction

30 Geo-hydrological hazards, including floods and landslides, are common geo-hydrological phenomena that  
31 cause serious damage and pose severe threats to the population worldwide. Currently, river flooding annually  
32 affects 21 million people worldwide, and the estimate is expected to reach 54 million people by 2030  
33 (<http://www.wri.org>). For landslides, Petley (2012) showed that human losses were considerably higher than  
34 had been previously considered. Global costs of geo-hydrological disasters have increased in recent decades  
35 and, in future decades, it is expected that the number of people at risk and the occurrence of extreme events will  
36 both grow (<https://www.ipcc.ch>). Integrated risk management involving public authorities, research scientists,  
37 companies, and citizens is required to address the interconnectivity between physical infrastructures, economic  
38 systems and the role of human factors (Jonkman and Dawson, 2012). The approach should encompass, in a  
39 coordinated way, all the necessary activities to maintain a level of security with regard the risk posed by natural  
40 hazards (<http://www.climchalp.org/>) including exchange of information and experience between public bodies,  
41 business bodies and citizens.

42 The availability of detailed and organized information on the geographical and temporal distribution of geo-  
43 hydrological events and their consequences, communicated throughout different media channels, is important  
44 to implement national communication strategies and preparedness programs. In Italy, detailed information on  
45 landslides and floods is available, and catalogues of landslide and flood events with fatalities have been  
46 organized and constantly updated (Guzzetti et al., 1994, 2005; Guzzetti and Tonelli, 2004; Salvati et al., 2010,  
47 2012, 2013). For this country, in recent decades, much effort has been exerted to analyse landslide and flood  
48 hazards and the associated risk at various geographical scales, from the site specific (local) to the synoptic  
49 (national) scale. Despite these efforts, most of these studies remain unknown to the public, that ignores the  
50 possible damaging effects that landslides and floods can produce (Salvati et al., 2014). Despite the large number  
51 and wide geographical distribution of landslide and flood events, the Italian population receives minimal  
52 information and has minimal knowledge on the type, characteristics, frequency, and severity of the harmful  
53 events that have occurred in the area where they live, or work. The lack of knowledge is amplified by a weak  
54 motivation of the people to be informed and as a consequence they demonstrate weak understanding and  
55 perception of geo-hydrological risk (Salvati et al., 2014).

56 Although, in the last few years, the Italian scientific community has begun to communicate information on geo-  
57 hydrological hazards and the associated risks through communication initiatives and thematic websites  
58 (<http://avi.gndci.cnr.it/>; <http://sici.irpi.cnr.it/>; <http://www.isprambiente.gov.it/it/progetti/suolo-e-territorio-1/iffi-inventario-dei-fenomeni-franosi-in-italia>; <http://www.pcn.minambiente.it/GN/>), these often suffer from  
59 the lack of effective communication strategies capable of addressing various targets with suitable media.  
60 Consequently, the initiatives remain addressed mainly to experts, for specific technical purposes with content  
61 and web interfaces that are barely appreciated by a wider audience, and rarely synchronized with social media  
62 networks.  
63

64 Various problems emerged when designing the communication strategy. First, public interest in the issue is  
65 important. As Keys (1999) noted, “*It has been apparent for some time that creating community awareness of*  
66 *floods and storms is not easy, (...) Most of the time, people are not particularly interested in them*” (O’Neil,  
67 2004). The core of the problem is to capture public attention and, with long-term actions, familiarise people to  
68 the topic. Knowledge-oriented risk communication campaigns on the causes and dynamics of geo-hydrological  
69 hazards and their possible consequences to human life, conducted with appropriate frequency, can effectively  
70 increase public awareness of geo-hydrological hazards. Second, it is important to find the appropriate mediators  
71 to reach the largest number of people. Media represent key mediators of communication between different  
72 audiences i.e., the public, scientists, policy-makers, and the operational management (Beck, 1992). They act as  
73 *social glue* with respect to the perception and interpretation of natural hazards in heterogeneous societies (Miles  
74 and Morse, 2007).

75 The mission of the POLARIS website is to provide correct and reliable information mainly to media, which  
76 will help to further communicate the information to other audiences. In addition, the role of social media should  
77 be carefully considered to engage audiences that are typically weakly interested in information on geo-  
78 hydrological risk. Thus, efforts were made to improve the link between the POLARIS website and the Facebook  
79 page (<https://www.facebook.com/CNR.IRPI>) of the Istituto di Ricerca per la Protezione Idrogeologica (IRPI,  
80 <http://www.irpi.cnr.it>), of the Italian Consiglio Nazionale delle Ricerche (CNR, <http://www.cnr.it>), by  
81 conveying immediate and concise information on natural disasters using pictures and videos, interspersed with  
82 invitations to visit the POLARIS website for detailed information.

83 Following an overview of the literature on natural hazard’s risk communication, in this paper, we describe the  
84 website information architecture; we analyse the users’ navigation data during the 21-month period since the  
85 website was published. Then, we explain possible relations between the maximum access and the context in  
86 which they occurred. Finally, we discuss possible future improvement of the site and conclude by summarizing  
87 our findings.

## 88 **2 Background in risk communication and perception**

89 Extensive discussions have been occurred in the past about the most appropriate ways to manage the potential  
90 consequences of natural hazards (Scolobig et al. 2015), and governments began to institutionalize disaster risk  
91 management processes and practices (McEntire, 2006). More recently, an integrated approach to risk  
92 management processes is emerging, encompassing in a coordinated way activities needed to preserve a level of  
93 safety with regard the risk posed by natural hazards (<http://www.climchalp.org/>). Initially associated with  
94 environmental management, public health, and emergency management matter, risk communication aims at  
95 informing people about a potential hazard and the associated harms (Steelman and McCaffrey, 2012). In the  
96 last decade, the relevance of communication is increasing in response to the changes affecting risk governance  
97 (Höppner et al., 2010). Accordingly, communication must serve multiple purposes spanning all phases of risk

98 management (Renn 2005) enabling more effective decisions, knowledge-based actions (Höppner et al., 2010),  
99 and addressing the exchange of knowledge and attitudes between all the involved actors (i.e., public bodies,  
100 private sectors, third sector, citizens). In this context, public participation is crucial, and defined as the co-  
101 decision in planning processes designed by others, where the central elements of the participation concept are  
102 influence, interaction, and information exchange (Bostenaru, 2004). Starting in the 1990s, extensive public  
103 consultation and participation in risk management have focused on re-establishing public trust (Rowe et al.,  
104 2004). The appropriate transfer of knowledge between experts and the broader public can be facilitated by  
105 effective communication strategies and programs, at national or local level, to align the views of the public with  
106 those of the experts (Frewer, 2004). More recently, the increased attention of public institutions to stimulate the  
107 participation of citizens in the definition and delivery of public services is leading to the adoption of a citizen-  
108 centred risk management approach which takes into account social concerns and the citizens' s perception about  
109 risks.

110 Risk perception is also important to determine the attitude towards risks and, when information campaigns and  
111 risk communication strategies are designed, the public perception should be known (Plapp & Werner, 2006).  
112 Risk perception is a subjective assessment of the hazard occurrence's probability and people's feelings of the  
113 consequences (Posner & Armas 2014). A gap between the public's perception of their own responsibility, and  
114 that of authorities in terms of risk reduction was found by Fernández-Bilbao and Twigger-Ross (2009) who,  
115 working in England and Germany, found that the public did not perceive that reducing flood risk was their  
116 responsibility. Plattner et al. (2006) highlighted a systematic discrepancy between the individual subjective risk  
117 evaluation (perceived), and formal risk evaluation procedures. Similarly, in Italy two national surveys  
118 conducted to measure the public perception of landslide and flood risk confirmed that in most of the Italian  
119 regions the observed perception of the threat did not match the long-term risk posed by landslides and floods to  
120 the population (Salvati et al., 2014).

121 If it is globally accepted that risk perception has strong implication for the success of risk communication. It is  
122 also expected that effective risk communication shapes risk perception (Höppner et al., 2010). There are many  
123 studies trying to establish which formats of communication may be most effective (e.g., Faulkner and Ball  
124 2007; Fernandez- Bilbao and Twigger-Ross 2009; Kashefi and Walker 2009; Bier 2001). Three phases of risk  
125 communication were identified by Leiss (1996) in the USA, including one-way communication, persuasive  
126 communication, and two-way communication. As Höppner et al. (2010) reported, the first is primarily used to  
127 convey probabilistic information, educate the public at risk, and to gain consent over risk management practices,  
128 whereas the second is thought to change people's risk related behaviours. In the latter phase, all actors should  
129 engage with, and learn from each other (Renn, 2005). Risk communication is a complex activity moving from  
130 the one-way distribution of information towards a two-way exchange of knowledge and more participatory  
131 approach (Höppner et al., 2010). Despite this latter communication approach seems to be more effective, in the  
132 review work conducted by Höppner et al. (2010) between all the communication practices posed by

133 governmental authorities, national and local agencies, the majority resulted one-way efforts, focused solely on  
134 improving hazard knowledge or raising risk awareness, mostly regarding flood hazard.

### 135 **3 Nomenclature**

136 In this work, we adopt the terminology and definitions used in Google Analytics. We use the term *session* to  
137 indicate the period of time a user is actively engaged with the POLARIS website. All usage data (screen views,  
138 events, ecommerce) are associated to a session. *Users* are people who have had at least one session in the  
139 selected date range, including new and returning users. *Pageviews* are the total number of pages viewed,  
140 including repeated views of the same page. The *source* is the place users were before viewing a POLARIS  
141 website content, including a search engine or another website. *Referral traffic* is Google's method of reporting  
142 visitors that arrived at a specific site from sources outside their search engine.

### 143 **4 POLARIS website**

144 The effectiveness of the POLARIS communication strategy relies on the main assumption that the scientific  
145 community can play a key role in increasing awareness (Bier, 2001) of individuals and groups on geo-  
146 hydrological hazards, and on the type and extent of the risk posed by geo-hydrological hazards to the population.  
147 This role should be attained working in two directions: (i) providing mass media (e.g., journalists) with correct  
148 and reliable information, which they can communicate (spread) further to the broader civil society, and (ii)  
149 adopting less technical and more widely comprehensible language to better engage citizens. Figure 1 shows the  
150 communication flow adopted in POLARIS, where the scientists use different communication approaches to  
151 mass media, civil protection and local/regional authorities, and to citizens. In this framework, the media captures  
152 information from scientists and uses it for communication purposes.

153 The scientific and technical content of POLARIS is based on a communication strategy that avoids scientific  
154 and technical terminology, in favour of a more widely understandable language. For this purpose, consultants  
155 experienced in web-communication strategies on natural hazards, info-graphics, and user experience design  
156 were involved in the initiative. The consultants' contribution consisted in arranging the messages using intuitive  
157 and engaging web interfaces to display data, graphs, tables, video and in carefully considering usability and  
158 accessibility of the website to diversified audiences.

159 POLARIS is based on a well-defined information architecture encompassing six main sections: (i) Reports, (ii)  
160 Are you prepared?, (iii) Events, (iv) Alert Zones, (v) Focus, and (vi) Blog. The sections provide different and  
161 complementary information, including: (i) periodical reports with analyses of landslide and flood risk to the  
162 population of Italy, (ii) suggestions on suitable behaviours to adopt before, during and after potentially  
163 damaging events, (iii) data and synthetic analyses of specific geo-hydrological events with human  
164 consequences, (iv) visual information on the morphology, geology, and historical damaging events of the Alert

165 Zones used by the Italian Civil Protection system for issuing warning on meteorological, hydrological, and  
166 geomorphological hazards, (v) detailed analyses of relevant topics or specific events with severe consequences,  
167 and (vi) blog-posts on landslide and flood events aimed at encouraging citizens' engagement. Fig. 2 shows the  
168 POLARIS home page, with specifically-designed images and graphics to help browse the website.

#### 169 4.1 Structure of the POLARIS website

170 The "Reports" section illustrates periodic reports on landslide and flood risk to the population of Italy. Reports  
171 are published every six months. The last report is available in two formats: (i) an on-line version, and (i) a  
172 standard Adobe® PDF (Portable Document Format) file. The on-line report is directly integrated with the CNR  
173 IRPI Spatial Data Infrastructure, SDI (Salvati et al., 2013) where the database is located, and has access to data  
174 kept updated regularly. Each report contains the list of landslides and floods that occurred in the period (six  
175 months, or a year), with information on the date, location, dead and missing persons, injured people, maps,  
176 statistics, and an analysis of the landslide and flood events with direct consequences to the population. Statistics  
177 are available for different periods of one, five, and fifty years, enabling comparative analyses of the  
178 geographical and temporal variations of geo-hydrological risk in Italy.

179 The "Events" section publishes information on specific meteorological events in Italy, using text, maps, videos,  
180 photographs, and drawings. In this section, specific icons were designed to define the type of the geo-  
181 hydrological events. A short text containing information on the sites affected, the damage, and the fatalities or  
182 casualties is given, with a map showing the location of landslide and flood that affected the population. The  
183 "Focus" section publishes information on specific topics, provides analysis for each Italian region, and offers  
184 descriptions of single historical or recent catastrophic geo-hydrological events. The "Events" and "Focus"  
185 sections jointly inform the population on the extent and severity of geo-hydrological risk in Italy. They also  
186 represent an important source of information and data for the mass media.

187 The "Alert zones" section provides information for 134 Alert Zones defined by the Italian National Civil  
188 Protection system to forecast geo-hydrological hazards, including landslides and floods. The section provides  
189 the possibility to query a number of information items, and a sidebar offers access to different thematic layers  
190 and maps for each Alert Zone.

191 The "Are you prepared?" section offers information on suitable (and unsuitable) behaviours to adopt before,  
192 during, and after a damaging geo-hydrological event. The suggested elementary behavioural rules may save  
193 people's lives.

194 Finally, the "Blog" section encourages bottom-up participation by users, who can post comments on geo-  
195 hydrologic hazards and risks.

196 In the home page, particular focus is reserved to a section called "It Happened Today" (Italian: *Accadde oggi*),  
197 which is a daily register of events in which, for each day of the year, POLARIS publishes a short description of

198 relevant events that adversely impacted the population that specific day. This section is directly linked to the  
199 CNR IRPI SDI, which daily automatically relates the event to the exact day.

## 200 **5 Data**

201 We use Google Analytics to monitor the traffic and performance of the POLARIS website, focusing our analysis  
202 on (i) channels used, (ii) number of sessions, (iii) number of users, (iv) users viewing single pages or the entire  
203 website, and (v) the geographical distribution of the users. We further monitored POLARIS' Facebook page  
204 using "Insight" instrument and particularly the number of "likes" given by users, or the number of users who  
205 viewed the posts. We also performed an analysis of the type of posts (containing video, link, images, or text  
206 alone) that interested more the users, and their origin.

## 207 **6 Analysis and results**

208 In this section, we describe the analysis performed to identify possible trends of interest to the POLARIS  
209 content, and the dependence between peak access values to the website and possible causes that increased the  
210 public interest in the website. We also performed similar analysis for the CNR IRPI Facebook page, which is  
211 the Institute's most active social network.

### 212 **6.1 POLARIS website**

213 The analysis of the data series available from Google Analytics for the period of the website publication, from  
214 16 January 2014 to 15 October 2015, allowed to prepare general statistics summarized in **Table 1**, where we  
215 listed the data separately for sessions, users, pageviews, and referrals from social networks. We studied the  
216 geographical distribution of the users, and the number of pageviews for each section of the website. Results are  
217 shown in Fig 3.

218 Since POLARIS is published in Italian, it is not surprising that the sessions mainly originate from Italy (91%).  
219 Figure 3a shows the geographical distribution of the sessions in Italy. The limited percentage of sessions  
220 originating from other nations concentrates in the USA, China, Japan, and Germany. Darker and larger dots in  
221 the map show the increasing number of sessions, with few areas where sessions are highly concentrated. The  
222 largest number of sessions originate from Umbria, where the main office of CNR IRPI is located. Other areas  
223 from where POLARIS was accessed frequently include Rome, where the majority of the government offices  
224 are located, Milan (Lombardy), Turin (Piedmont), Genoa (Liguria) and Palermo (Sicily). These cities host  
225 institutes and researchers who are interested in geo-hydrological issues. Collectively, they also host 6 million  
226 people, 10% of the entire population of Italy.

227 The pie chart in Fig. 3 shows the number of pageviews for the different sections of the website. Not surprisingly,  
228 the home page is the most viewed page, containing, in addition to the navigation menu, the "It Happened Today"



229 (*Accadde Oggi*) section, which is read by many people, most probably because the content changes daily. The  
 230 second most viewed section is the Report section, which publishes periodic reports on the risks posed to the  
 231 Italian population by landslides and floods. This section is updated every six months, and allows to download  
 232 the reports as PDF files. The “Focus” and “Event” sections have similar access percentages. Their content is  
 233 simple to read and straightforward to understand thanks to explicative figures and maps. The content differs in  
 234 the subjects; on the Focus page, we discuss in-depth issues related to geo-hydrological hazards and risks,  
 235 whereas the Events section is dedicated to the description of specific events that caused damages to the Italian  
 236 population. The “Alerts Zones” and “Are You Prepared?” sections were not accessed as much as expected,  
 237 although they both contain relevant information and suggestion to help develop suitable behaviours toward  
 238 disaster resilience.

239 Monitoring the number of sessions during the 21 months since the website’s publication, it was possible to  
 240 study their temporal distribution. For the purpose, we normalized the number of sessions per day to the daily  
 241 average number of sessions in the 21-month period (long-term average, 26.9). Results are shown in Fig. 4,  
 242 where the ratio in the x-axis represents the daily access number divided by the average access number in the  
 243 observation period. The grey parts of the line show periods below the long-term average, and the blue parts  
 244 show periods above the long-term average. Inspection of Fig. 4 reveals that there was an increase in the number  
 245 of sessions (blue dashed line in Fig. 4) and significant variations in the daily distribution are also evident. We  
 246 note that in 350 days of 2014, 42 days (12%) were above average and 308 days (88%) were under the average.  
 247 In the 288 days of 2015 (until 15 October 2015), the trend changed, with 182 days (63.2%) above the long-term  
 248 average (Table 1).

249 To investigate the possibility of a repeating pattern or periodic signal in the record, the time series with the  
 250 number of sessions were analysed using the autocorrelation function (ACF). The ACF measures the degree of  
 251 correlation between a signal and the signal itself shifted by a given lag, and is defined as:

$$252 \quad ACF = \frac{1}{n\sigma^2} \sum_1^{n-k} (X_i - \bar{x})(X_{i+k} - \bar{x}) \quad \text{eq. (1)}$$

253 where  $k$  is the lag (a day in this case),  $n$  is the length of the time series (607 days),  $\sigma$  is the standard deviation  
 254 of the values (i.e., the standard deviation of the number of sessions),  $\bar{x}$  is the average of the values (i.e., the  
 255 average of the number of sessions), and  $X_i$  is a given value of the time series (the value of the number of  
 256 sessions of the day  $i$ ). Due to the evident increasing trend (non-stationary) in the average number of sessions  
 257 during the observation period (dashed line in Fig. 4), data have been detrended. The trend has been defined  
 258 fitting a curved line (Fig. 5a) obtained applying a kernel smoother based on a normal weight function in a  
 259 bandwidth of 100 days. Figure 5b shows the coefficients (ACF) calculated per different lag times. The  
 260 autocorrelation value varies between 1 and -1, and the area between the blue dashed lines represents non-  
 261 significant autocorrelation values. The analysis revealed that the value of ACF decreases when the lag  $k$  (days)  
 262 increases, and that a marginally significant value of autocorrelation can be observed only for a lag of seven days

263 (a week). However, because the correlation value is not significant at 14 or 21 days, we conclude that the time  
264 series of the number of sessions of the POLARIS website does not show evidence of a periodic pattern. The  
265 same analysis was performed detrending the data fitting a linear interpolation (dashed line in Fig. 4). Again, the  
266 analysis did not reveal a periodic trend.

267 To gain a better understanding of the temporal distribution of the user access, and to identify peak values, we  
268 used the daily number of users and pageviews obtained from Google Analytics. We then related the peak values  
269 to several factors, including (i) the occurrence of harmful geo-hydrological events, (ii) the daily early warnings  
270 from the Italian National Department of Civil Protection, (iii) the publication of new content in the web site,  
271 (iv) the publication of press releases that used our data, and (v) the promotion of the website through media.

272 Figure 6 shows the daily user statistics (Fig. 6a), and a comparison between users and number of pageviews  
273 (Fig. 6b), for the 21-month period of website publication, with icons located to identify possible relations. We  
274 note how the relation between the peak values and the occurrences of the harmful events until December 2014  
275 became increasingly less relevant since the early months of 2015. In particular, during the period ranging from  
276 15 January to 31 December 2014, the majority of the peaks were registered in the interim of the harmful event  
277 occurrences, i.e., on 16-22 January (25 users, 51 sessions, 425 pageviews), when the two Italian regions of  
278 Liguria and Emilia Romagna were hit by heavy rain, which caused two fatalities, and a railway interruption to  
279 France was caused by a landslide. Similarly, on 6-15 October, an event hit Liguria and other regions in the  
280 North of Italy causing four deaths and generating a peak with 44 users, 48 sessions and 115 pageviews. Other  
281 correspondences were identified with the icons used to indicate the events, the same as those we used to indicate  
282 the type of event (landslide, flood and geo-hydrological events) on the website. Other peak values were related  
283 to the publication of new contents. A peak occurred on 15 September 2014 due to a post dedicated to a relevant  
284 paper published by the CNR IRPI researchers (38 users, 50 sessions and 110 pageviews); it also occurred on  
285 19 November, due to the publication of the “Are you prepared?” section, explaining how to behave during geo-  
286 hydrological events (80 users, 94 sessions and 192 pageviews). The maximum value was registered when the  
287 website was promoted through television by a meteorologist during an evening national broadcasting program  
288 (338 users, 362 sessions and 951 pageviews).

289 Another important value corresponds to the press release launch on 13 January 2015, to disseminate the annual  
290 report on the geo-hydrological risk to the population; this was prepared for 2014 and available in the Report  
291 section (119 users, 141 sessions, 436 pageviews). After these announcements, the site has begun to be consulted  
292 by journalists and technicians of different government offices and agencies working on land management. This  
293 finding is confirmed by the publication of POLARIS’s maps and statistics in national newspapers and in on-  
294 line media corresponding to major event occurrences that captured the interest of the public and to the citation  
295 of the website URL in reports published by national or regional institutions. The finding means that POLARIS  
296 offers quick and easy access to essential information on geo-hydrological hazards and risks.

297 During 2015, the relation with the occurrence of the events decreased; however, the relation with the  
298 publications of new content became more significant. Analysing the sources where the POLARIS traffic  
299 originates daily, we found that other peaks were the consequences of the daily activity of users from government  
300 offices or agencies. In Fig. 6b, we plotted the users and the pageviews data together. The mean number of pages  
301 per user, in the entire period, was 2.5; however, the inspection of Fig. 6b reveals that the variability of this ratio  
302 is very large, and days exist when the mean value has been largely exceeded. This result demonstrates that  
303 people browse through the site's pages before leaving.

304 We maintain that the relation to the occurrences of harmful events depends on the new, specific content and the  
305 videos that are published during or immediately after harmful events not only on POLARIS but also on the  
306 CNR IRPI social network pages from which people can directly access POLARIS.

## 307 **6.2 CNR IRPI Facebook**

308 Each new content item published on POLARIS was shared via Facebook and Twitter, the two most popular  
309 social networks in Italy. We use Facebook and Twitter CNR IRPI accounts to disseminate simple and immediate  
310 messages addressing the geo-hydrological hazards. In particular, the objective is to increase the public  
311 awareness of the frequency and proximity of the geo-hydrological events and to disseminate media showing  
312 hazardous behaviours that pose serious, fatal risks to people.

313 Analysing the number of referrals from the social networks, corresponding to 14% of the total, we found that  
314 the majority (80%) originates from Facebook. The simpler modality of sharing content offered by Facebook  
315 with respect to a website makes the publication of links and videos easier. Social media is very widely used  
316 when a severe weather condition is occurring. Therefore, it is relevant to compare the number of people who  
317 have viewed the content of the CNR IRPI Facebook page with the occurrence of extreme rainfall conditions  
318 and or severe warning declarations of the Italian National Department of Civil Protection. For the purpose, we  
319 used Facebook statistics because it is the social network from which the majority of the access to POLARIS  
320 was registered.

321 To define the extreme rainfall conditions that occurred in Italy, we exploited an analysis based on hourly rainfall  
322 measurements. The analysis was performed in the 84-day period between 1 August and 23 October 2015. We  
323 exploited sub-hourly rainfall measurements by more than 2000 rain gauges distributed over the entire Italian  
324 territory. According to the method described by Rossi et al. (2015), the empirical cumulative distribution  
325 function (ECDF) of the cumulative rainfalls has been modelled for each rain gauge. The function allows the  
326 calculation of the non-exceedance probability for any given cumulative rainfall and for a set of predefined  
327 durations (3, 6, 12, 24 h), which estimates the non-exceedance probability of the cumulated rainfalls, for each  
328 rain gauge. To obtain a continuous representation for the entire Italian territory, the rain gauge data have been  
329 interpolated using an inverse distance weighted (IDW) algorithm. This process resulted in a set of four (one for

330 each duration) raster maps that show the non-exceedance probability of the cumulative rainfalls. The maps have  
331 been analysed to identify the days when at least 10% of the Italian territory has been interested by a non-  
332 exceedance probability of 80%. This probability value corresponds to cumulative rainfall events that can be  
333 defined as extreme events and that could have triggered geo-hydrological events.

334 The results of the analyses showed that, in the considered period, the extreme conditions occurred six times for  
335 a duration of 3 h, 12 times for a duration of 6 h, 15 times for a duration of 12 h, and seven times for a duration  
336 of 24 h. We plotted these extreme conditions in the daily distribution of Facebook users shown in Fig. 7. We  
337 observed that extreme conditions, represented by blue dots on the basis of their duration, occurred on 16 days  
338 (19% of the days in the investigated period), grouped into 11 meteorological events that lasted one or more  
339 days. In the graph, we plotted with a red icon the days for which it is known that severe warnings of the Italian  
340 National Department of Civil Protection were enacted; the days when severe geo-hydrological events occurred  
341 are shown in orange in Fig. 7. Analysing the four highest peaks, the first (September 16, 2060 peak value)  
342 corresponds to the publication of videos and images regarding the Piacentino (Emilia-Romagna region) flood  
343 event of September 13-14, 2015, which caused three deaths and serious damage. The second event on October  
344 6 corresponds to the publication of a re-visit of the Vajont disaster (the most disastrous landslide event that has  
345 occurred in Italy) in POLARIS at a date near the event's anniversary; this was immediately shared with  
346 Facebook. A few days later, on October 10, the publication of a video showing cars dragged by the water flow  
347 caused by heavy rainfall in the Tyrrhenian Messina area (Sicily region) caused a 3916 peak value; finally, the  
348 peak of October 21 related to the publication of content that triggered a strong debate. Although the 3-month  
349 investigation period is very short, we can observe that, apart the first half of August, there is suitable  
350 correspondence with the rainfall extreme conditions and the peak values of Facebook access. In addition, the  
351 peak values correspond to the content published and that people shared.

## 352 7 Discussion

353 In Polaris we mean risk communication as a two-way exchange of related information and knowledge on natural  
354 hazards and associated risk for the population. The Blog section of the website is mainly encouraging bottom-  
355 up feedback through visitors' s comments. The link to Facebook stimulates more feedback from citizens who  
356 upload pictures and make post on Facebook. This means that participation, whose central elements are  
357 influence, interaction and information exchange (Bostenaru, 2004), is mainly facilitated by the link with  
358 Facebook. However, the website Blog section remains less active than we expected, for at least two reasons:  
359 first, in Italy, the perception of geo-hydrological hazards is still very weak, people show less interested toward  
360 these geo-hydrological events than to other natural hazards such as, seismic risk (Salvati et al., 2014). Second,  
361 people do not know how a geo-hydrological event can hit them. People are interested to actively participate  
362 through the blog section mainly when a particularly disastrous event is occurring, and in such a case, by simply  
363 uploading videos and pictures rather than asking for explanation or advices. This means that, despite many

364 institutions are making efforts to increase the public understanding of geo-hydrological risk through nationwide  
365 awareness campaigns (e.g. I do not risk, <http://iononrischio.protezionecivile.it/>), people still ignore how a large  
366 part of the Italian territory suffers of geo-hydrological risk. Such an underestimation of the possible risks, the  
367 high confidence in the local administrators towards which citizens delegate their personal safeness are all factors  
368 that impede an effective risk communication.

369 It is important to highlights that Polaris offers a knowledge-oriented risk communication which tends to operate  
370 continuously and does not regard the warning messages released in the event of a disaster. The communication  
371 efforts seeks to change the people's attitudes to the geo-hydrological hazard that they may have encountered  
372 giving many examples of what had happened before. People will not react to risk warnings if foregoing  
373 communication has not motivated and prepared them.

374 For this purpose, we are going to evolve the Blog section of Polaris which is the most relevant for stimulating  
375 public participation at any moment. In particular, we plan to integrate other relevant social media, such as  
376 Instagram and Pinterest, stimulating the sharing of images and videos and the associated tags and comments.  
377 For encourage more resilient behaviours during the occurrences of hazardous events, we would stimulate the  
378 usage of video through the YouTube and Vimeo channels that we can comment for feedback and/or advices.  
379 Finally, we are going to create new synergies with the "I do not risk" campaign and website of the Italian  
380 Department of Civil Protection, which will increase traffic, information exchange and, as such, strengthen the  
381 risk perception by the Italian population.

## 382 **8 Concluding remarks**

383 The analysis we conducted in the 21 months after publication of the POLARIS website allowed the following  
384 considerations. The geographical distribution of people interested in the published topics is widespread  
385 throughout Italy, with a few geographical areas in which sessions are highly concentrated. After the home page,  
386 the most viewed website section is the Report, followed by the Focus and Events sections. In a period shorter  
387 than two years, the number of sessions has generally increased; however, we observed that, in 2015, the most  
388 significant positive step occurred. The analysis of the time series, performed to identify possible periodical  
389 signals in the daily distribution of sessions, did not highlight any relevant information.

390 Monitoring the access of users to the POLARIS website and the number of pageviews during its publication  
391 period from 16 January 2014 to 15 October 2015, we noticed that, frequently, the peak values correspond to the  
392 occurrence of particularly damaging geo-hydrological events. However, inspection of the daily statistics  
393 available for CNR IRPI Facebook demonstrated that a correspondence exists between the extreme rainfall  
394 events and the number of people who have viewed the content Facebook page. This finding was expected  
395 because CNR IRPI Facebook page's objective is to capture the attention of the public at large by proposing  
396 content that satisfies their curiosity and their immediate interest during extreme events, which increases the  
397 number of followers. Because the Facebook page is linked to POLARIS, an increase in Facebook followers can

398 trigger a gradual increase in the number of people interested in more structured and specialized content and data  
399 on geo-hydrological topics such as those published on POLARIS. Similarly, the specificity, scientifically based,  
400 of the POLARIS content, which is focused on geo-hydrological hazard and risk, became a source of information  
401 for journalists and media operators. The growth of user access when media operators publicized the website,  
402 suggested that we enhance our collaboration with scientific journalists by linking traditional (e.g., television)  
403 and social media to further enlarge the awareness of the website, and to better explain to users how to exploit  
404 the website information.

405 The POLARIS initiative demonstrates how the scientific community can implement different communication  
406 strategies to enhance an effective process that helps different audiences to understand (i) how risks associated  
407 with geo-hydrological hazards are estimated and (ii) how risks can be reduced by increasing knowledge to the  
408 population.

#### 409 **Acknowledgments**

410 We thank Salvatore Buda and Vito Lo Re for the website design and info-graphic development, and Mauro  
411 Rossi for making available the non-exceedance probability cumulative rainfall maps' rainfall data series. The  
412 study was partially financed by the Italian National Department of Civil Protection (DPC). CB was supported  
413 by a grant of the DPC.

#### 414 **9 References**

- 415 Beck, U.: Risk Society: Towards a New Modernity, Published in association with Theory, Culture & Society,  
416 SAGE Publication, 260 pp., 1992.
- 417 Bier V.M.: On the state of the art: risk communication to the public, Reliab. Eng. Syst. safe., 71, 139-150,  
418 doi:10.1016/S0951-8320(00)00090-9, 2001.
- 419 Bostenaru Dan, M.D.: Review of retrofit strategies decision system in historic perspective, Nat. Hazards Earth  
420 Syst. Sci., 4, 449-462, doi:10.5194/nhess-4-449-2004, 2004.
- 421 Faulkner, H. and Ball D.: Environmental hazards and risk communication, Environmental Hazards, 7, 71-78,  
422 doi: 10.1016/j.envhaz.2007.08.002, 2007.
- 423 Fernández-Bilbao A. and Twigger-Ross C.: Improving Response, Recovery and Resilience, Improving  
424 Institutional and Social Responses to Flooding, Science Report SC060019, Work Package 2, Environment  
425 Agency, Bristol, 134 pp., 2009.
- 426 Frewer, L.: The public and effective risk communication, Toxicol. Lett., 149, 391-397,  
427 doi:10.1016/j.toxlet.2003.12.049, 2004.
- 428 Jonkman S.N. and Dawson R.: Issues and Challenges in Flood Risk Management - Editorial for the Special  
429 Issue on Flood Risk Management, Water, 4, 785-792, doi:10.3390/w4040785, 2012.
- 430 Guzzetti F. and Tonelli G.: Information system on hydrological and geomorphological catastrophes in Italy  
431 (SICI): a tool for managing landslide and flood hazards. Nat. Hazards Earth Syst. Sci., 4, 213-232,  
432 doi:10.5194/nhess-4-213-2004, 2004.

- 433 Guzzetti, F., Cardinali, M., and Reichenbach, P.: The AVI Project: A bibliographical and archive inventory of  
434 landslides and floods in Italy, *Environ. Manage.*, 18, 623–633, doi: 10.1007/BF02400865, 1994.
- 435 Guzzetti, F., Stark C.P., and Salvati, P.: Evaluation of flood and landslide risk to the population of Italy.  
436 *Environ. Manage.*, 36, 15-36, doi:10.1007/s00267-003-0257-1, 2005.
- 437 Höppner, C., Bründl, M., and Buchecker, M.: Risk communication and natural hazards. WP5 Report, Swiss  
438 Federal Research Institute WSL, available at: [http://caphaz-net.org/outcomes-results/CapHaz-Net\\_WP5\\_Risk-](http://caphaz-net.org/outcomes-results/CapHaz-Net_WP5_Risk-Communication.pdf)  
439 [Communication.pdf](http://caphaz-net.org/outcomes-results/CapHaz-Net_WP5_Risk-Communication.pdf), 2010.
- 440 Höppner, C., Whittle R., Bründl, M., and Buchecker M.: Linking social capacities and risk communication in  
441 Europe: a gap between theory and practice? *Nat. Hazards*, 64, 1753-1778, doi: 10.1007/s11069-012-0356-5,  
442 2012.
- 443 Kashefi, E. and Walker, G.: How the Public and Professional Partners Make Sense of Information About Risk  
444 and Uncertainty - Literature Review, Science Project SC070060, Environment Agency, Bristol, 2009.
- 445 Leiss, W.: Three phases in the evolution of risk communication practice, *Ann. Am. Acad. Polit. Soc. Sci.*, 545,  
446 85-94, doi: 10.1177/0002716296545001009, 1996.
- 447 Nenciu Posner C. and Armas I.: Conceptual approaches concerning risk, vulnerability and adaptation, *Riscuri*  
448 *și Catastrofe*, 15(2), 7-24, 2014
- 449 McEntire D.: *Disaster Response and Recovery: Strategies and Tactics for Resilience*. Wiley, Hoboken, 2006.
- 450 Miles, B. and Morse S.: The role of news media in natural disaster risk and recovery, *Ecol. Econ.*, 63, 365-373,  
451 doi:10.1016/j.ecolecon.2006.08.007, 2007.
- 452 O'Neill, P.: Developing a risk communication model to encourage community safety from natural hazard,  
453 available at: [http://www.ses.nsw.gov.au/content/documents/pdf/research-](http://www.ses.nsw.gov.au/content/documents/pdf/research-papers/42904/Developing_a_risk_communication_model.pdf)  
454 [papers/42904/Developing\\_a\\_risk\\_communication\\_model.pdf](http://www.ses.nsw.gov.au/content/documents/pdf/research-papers/42904/Developing_a_risk_communication_model.pdf), 2004.
- 455 Pearce, L.D.R.: *An Integrated Approach For Community Hazard, Impact, Risk and Vulnerability Analysis: HIRV*. PhD thesis, Univ. of British Columbia, Vancouver, B.C., Canada, 2000.
- 457 Petley, D.: Global patterns of loss of life from landslides, *Geology*, 40(10), 927-930, doi: 10.1130/G33217.1 ,  
458 2012.
- 459 Plapp T., and Werner U.: Understanding risk perception from natural hazard: Example from Germany, in:  
460 *Risk21 - Coping with Risks due to Natural Hazards in the 21st Century*, Ammann W., Dannenmann S., Vulliet  
461 L. (eds.), Taylor and Francis, London, 101- 108, 2006.
- 462 Plattner Th., Plapp T., Hebel B.: Integrating public risk perception into formal natural hazard risk assessment,  
463 *Nat. Hazards Earth Syst. Sci.*, 6, 471–483, doi:10.5194/nhess-6-471-2006, 2006.
- 464 Renn, O., *White paper on Risk Governance: Towards an integrative approach*, International risk governance  
465 council, Geneva, 2005
- 466 Rossi, M. Torri, D., and Santi, E.: Bias in topographic thresholds for gully heads. *Nat. Hazards*, 79, Supplement  
467 1, 51–69, doi: 10.1007/s11069-015-1701-2, 2015.
- 468 Rowe, G. and Frewer L.J.: A Typology of Public Engagement Mechanisms. *Sci. Technol. Hum. Val.*, 30(2),  
469 251-290, doi: 10.1177/0162243904271724, 2005.
- 470 Salvati, P., Bianchi, C., Rossi, M., and Guzzetti, F.: Societal landslide and flood risk in Italy. *Nat. Hazards Earth*  
471 *Syst. Sci.*, 10, 465-483, doi:10.5194/nhess-10-465-2010, 2010.
- 472 Salvati, P., Bianchi, C., Rossi, M., and Guzzetti F.: Flood Risk in Italy, in: *Changes of flood risk in Europe*,  
473 Kundzewicz, Z. (ed.), IAHS Special Publication 10, IAHS Press, UK, 277-292, 2012, available at  
474 <http://www.iahs.info/bluebooks/SP010.pdf>, 2012.
- 475 Salvati P., Marchesini I., Balducci V., Bianchi C., Guzzetti F.: A New Digital Catalogue of Harmful Landslides  
476 and Floods in Italy, in: *Landslide Science and Practice, Proceedings of the Second World Landslide Forum*,

- 477 Rome, 19-25 September 2011, edited by Margottini C., Canuti P., and Sassa K. (eds.), Vol. 3: Spatial Analysis  
478 and Modelling, 409-414, ISBN: 978-3-642-31309-7, 2013.
- 479 Salvati, P., Bianchi, C., Fiorucci F., Giostrella P., Marchesini I. and Guzzetti F.: Perception of Flood and  
480 Landslide Risk in Italy: a Preliminary Analysis. *Nat. Hazards Earth Syst. Sci.*, 14, 2589-2603, doi:  
481 10.5194/nhess-14-2589-2014, 2014.
- 482 Scolobig A., Prior T., Schroter D., Jorin J., and Patt A.: Towards people-centered approaches for effective  
483 disaster risk management: Balancing rhetoric with reality, *International Journal for Disaster Risk Reduction*,  
484 12: 202-212, doi: 10.1016/j.ijdr.2015.01.006, 2015.
- 485 Steelman T.A. and McCaffrey S.: Best practices in risk and crisis communication: Implications for natural  
486 hazards management, *Nat. Hazards*, 65, 683-705, doi: 10.1007/s11069-012-0386-z, 2013.
- 487 Vasterman, P., Yzermans C. J., and Dirkzwager A.: The role of the media and media hypes in the aftermath of  
488 disasters, *Epidemiol. Rev.*, 27, 107-114, doi: 10.1093/epirev/mxi002, 2005.
- 489
- 490



491 **Figure captions**

492 **Figure 1.** The POLARIS communication flow.

493 **Figure 2.** The POLARIS Home Page (<http://polaris.irpi.cnr.it>). Violet boxes show English translation of original Italian  
494 text.

495 **Figure 3.** General statistics from Google Analytics for the 638-day period from 16 January 2014 to 15 October 2015. (a)  
496 map showing the geographical distribution of the sessions in Italy. (b) Pie chart shows number of pageviews for different  
497 sections of the website.

498 **Figure 4.** Daily average access number to the POLARIS website in the 638-day period from 16 January 2014 to 15 October  
499 2015.

500 **Figure 5.** (a) Plot shows the original data (points) and the line (violet line) describing its trend. (b) Chart shows  
501 Autocorrelation Coefficient Function (ACF) calculated using the time series of the number of sessions of the POLARIS  
502 website.

503 **Figure 6.** (a) Daily number of users of the POLARIS web site in the 638-day period from 16 January 2014 to 15 October  
504 2015. (b) Daily number of pageviews (violet line) and users (blue line) in the same period.

505 **Figure 7.** Number of unique Facebook page users. Days with extreme rainfall conditions are marked by blue dots, days  
506 with the major geo-hydrological events are marked by orange diamonds, and days with severe warning declarations are  
507 marked by red dots.

508

509

|                       | Statistics                | Number                    |
|-----------------------|---------------------------|---------------------------|
| Sessions              | Total                     | 17,159                    |
|                       | Daily average             | 26.9                      |
|                       | Average duration          | 00:02:38                  |
|                       | Days above average (2014) | 42 (12%)                  |
|                       | Days above average (2015) | 182 (63.2%)               |
| Users                 | Total                     | 11,529                    |
|                       | Daily average             | 23.3                      |
|                       | Days above average (2014) | 37 (10.6%)                |
|                       | Days above average (2015) | 180 (62.5%)               |
| Pageviews             | Total                     | 44,032                    |
|                       | Daily average             | 69                        |
|                       | Average per session       | 2.6                       |
|                       | Days above average (2014) | 68 (19.4%)                |
|                       | Days above average (2015) | 165 (57.3%)               |
|                       | Home page                 | 14,284                    |
|                       | Report section            | 5976                      |
|                       | Focus section             | 5509                      |
|                       | Significant Event section | 5489                      |
|                       | Blog section              | 2550                      |
|                       | Alert Zones section       | 2108                      |
|                       | Are You Prepared? section | 1894                      |
|                       | Referrals                 | Total from Social Network |
| Facebook              |                           | 1917 (80%)                |
| Twitter               |                           | 430 (18%)                 |
| Other Social Networks |                           | 47 (2%)                   |

510

511 **Table 1: POLARIS website general statistic for sessions, users, pageviews, and referrals from social networks,**  
512 **calculated using Google Analytics data.**

513

514

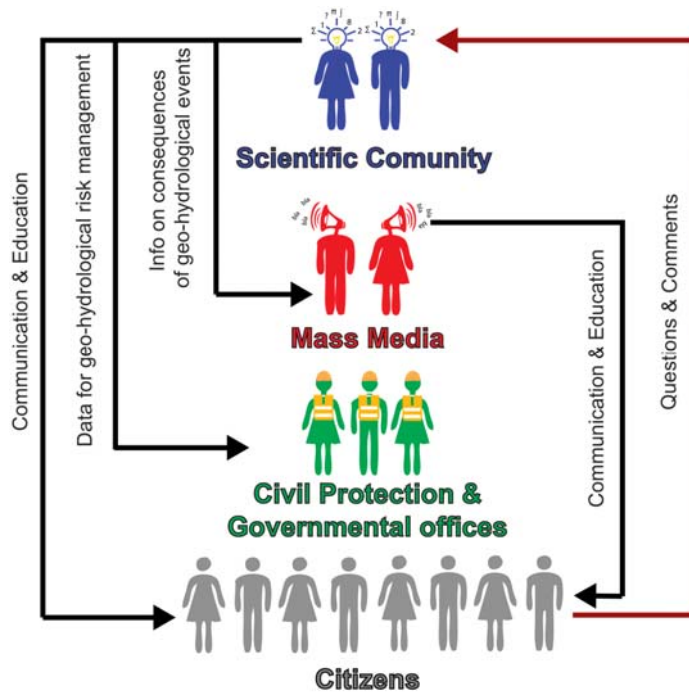

515

516 Figure 1: The POLARIS communication flow.

517

518

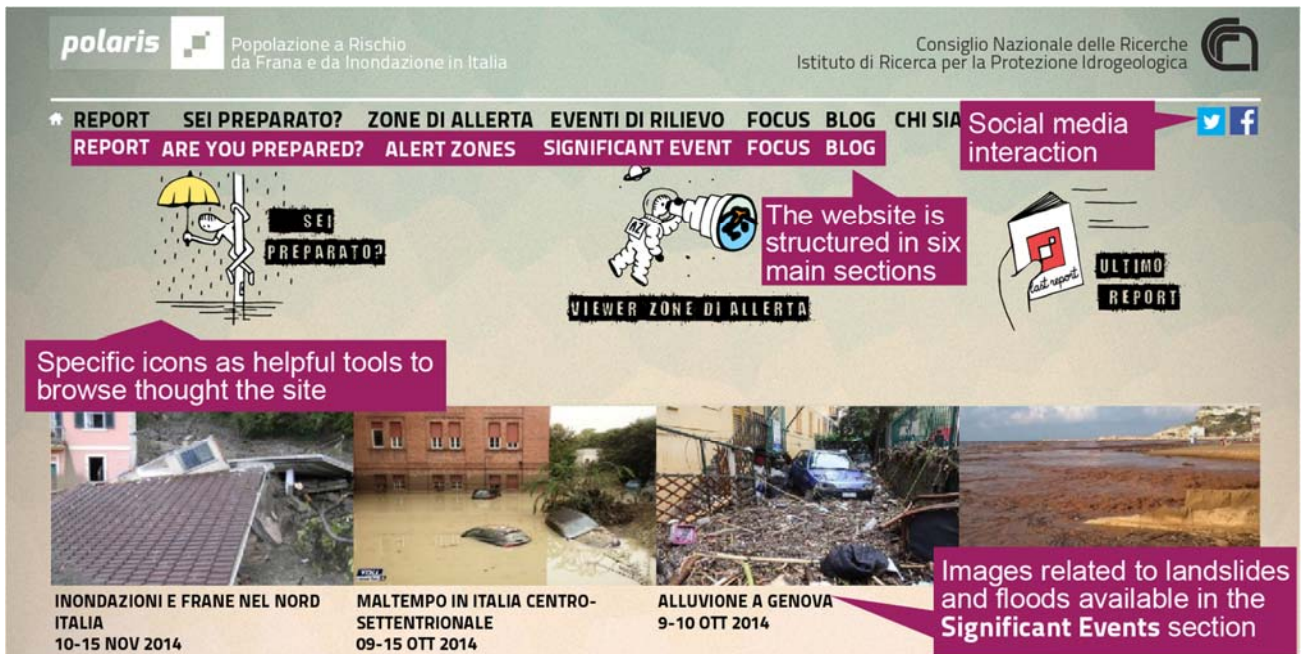

519  
520  
521  
522  
523  
524

Figure 2: The POLARIS Home Page (<http://polaris.irpi.cnr.it>). Violet boxes show English translation of original Italian text.

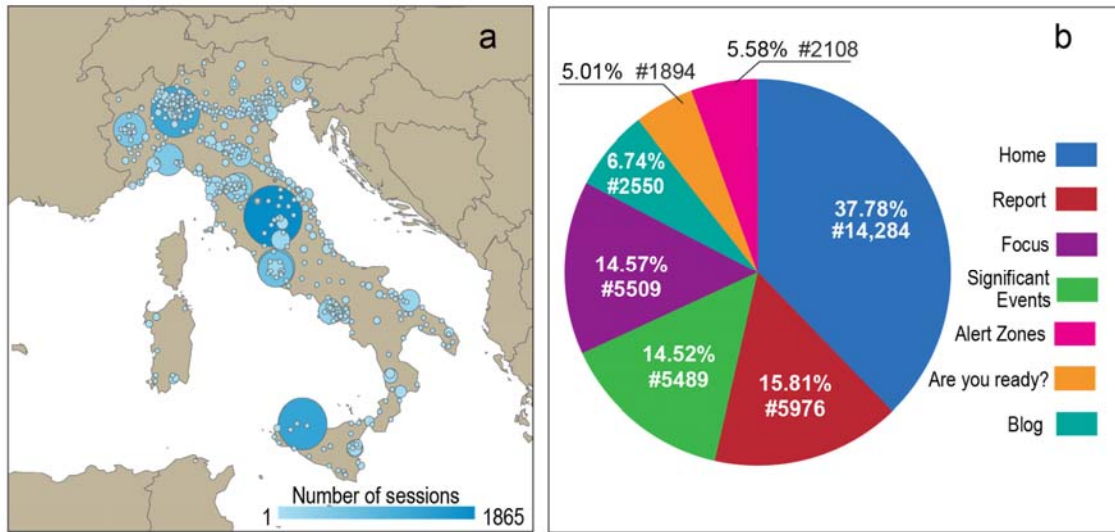

525

526

527 **Figure 3: General statistics from Google Analytics for the 638-day period from 16 January 2014 to 15 October 2015.**

528 **(a) map showing the geographical distribution of the sessions in Italy. (b) Pie chart shows number of pageviews for**

529 **different sections of the website.**

530

531

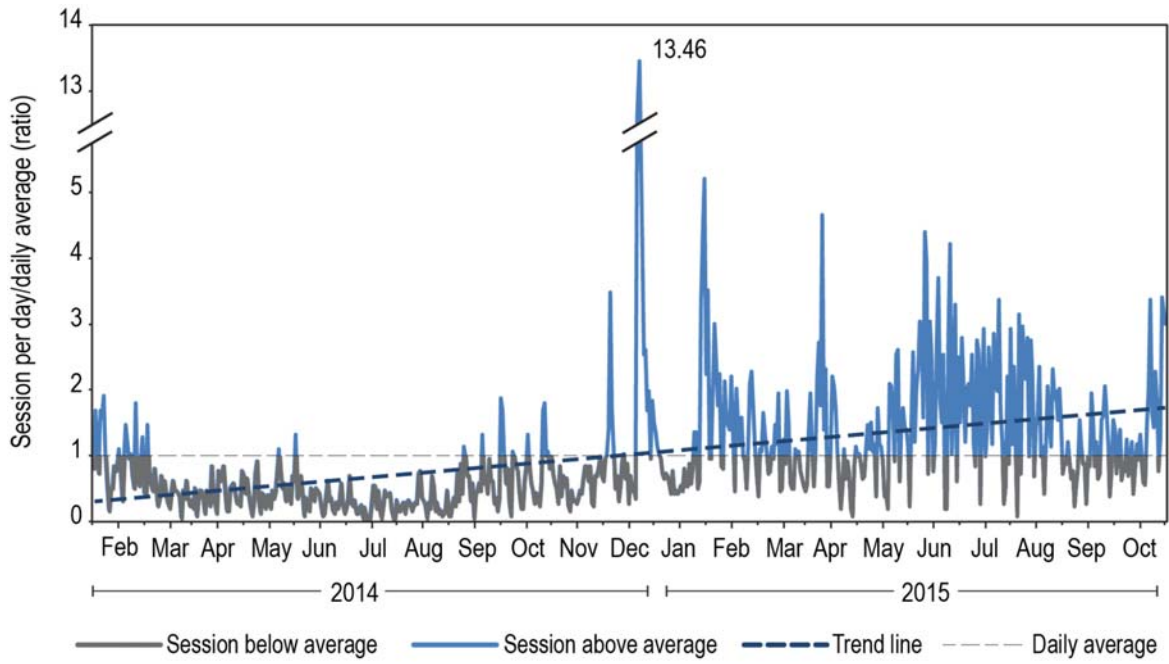

532

533 **Figure 4: Daily average access number to the POLARIS website in the 638-day period from 16 January 2014 to 15**  
 534 **October 2015.**

535

536

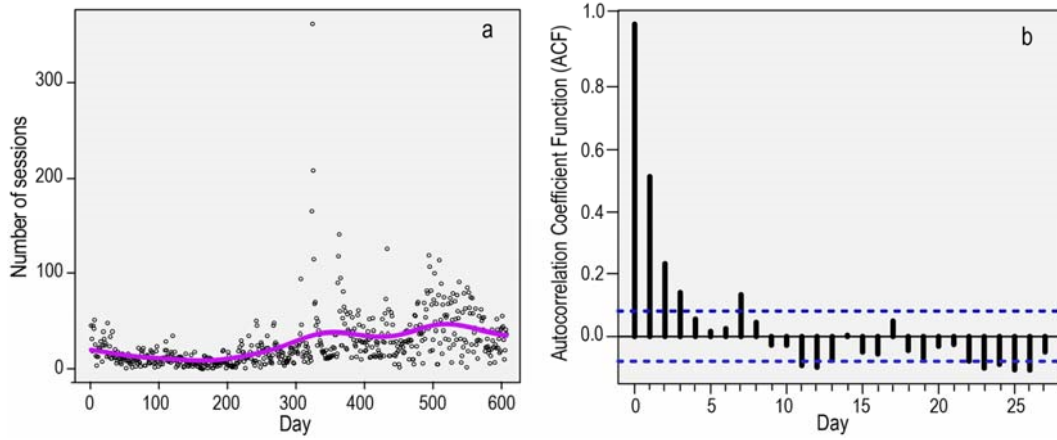

537  
538

539 **Figure 5: (a) Plot shows the original data (points) and the line (violet line) describing its trend. (b) Chart shows**  
540 **Autocorrelation Coefficient Function (ACF) calculated using the time series of the number of sessions of the**  
541 **POLARIS website.**

542  
543

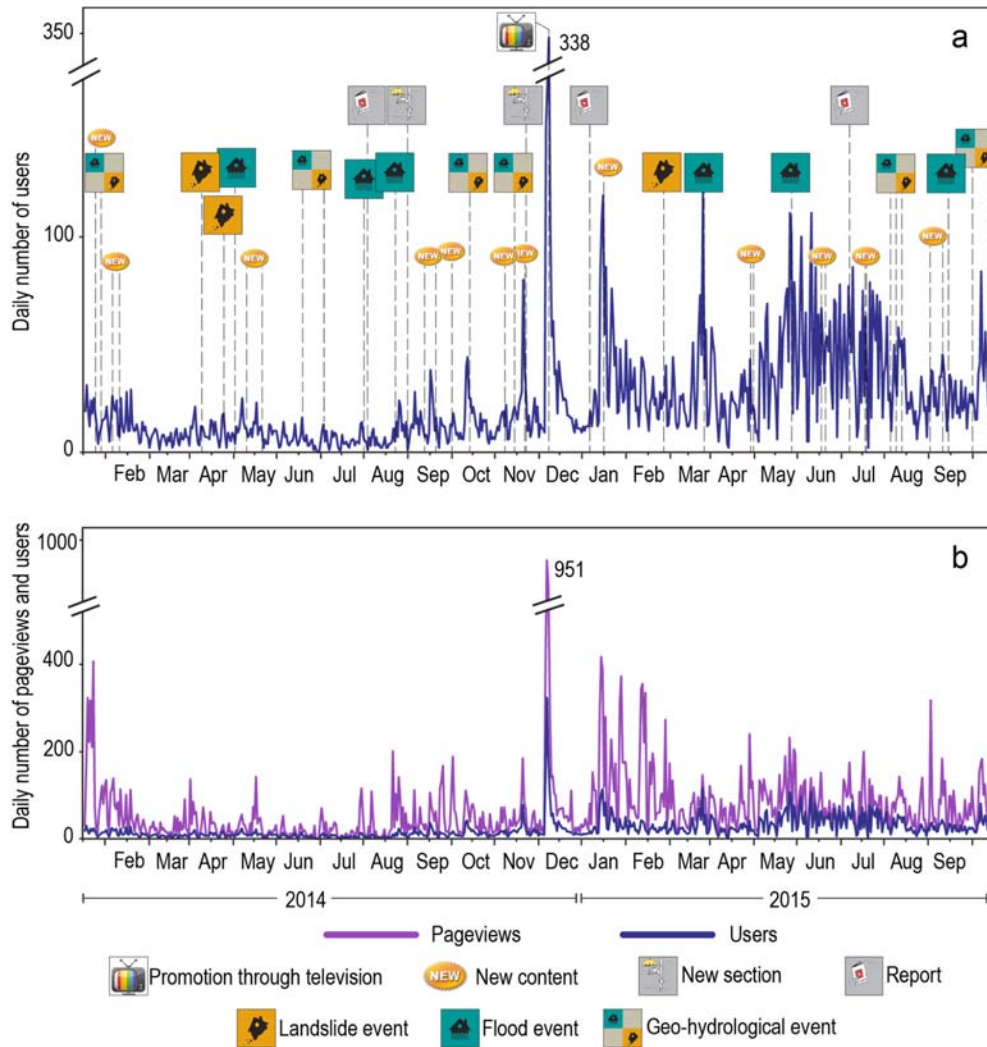

544  
 545  
 546  
 547  
 548  
 549

Figure 6: (a) Daily number of users of the POLARIS web site in the 638-day period from 16 January 2014 to 15 October 2015. (b) Daily number of pageviews (violet line) and users (blue line) in the same period.



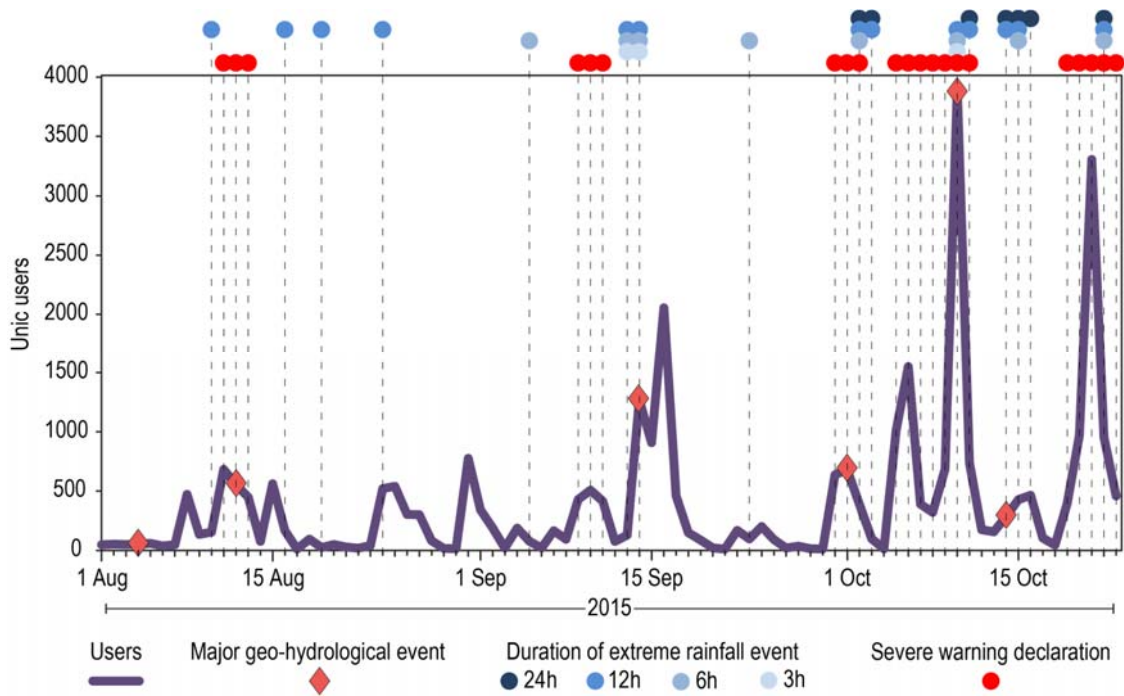

550  
551  
552  
553

Figure 7: Number of unique Facebook page users. Days with extreme rainfall conditions are marked by blue dots, days with the major geo-hydrological events are marked by orange diamonds, and days with severe warning declarations are marked by red dots.
